# Supplementary material for: Cold tolerance is linked to osmoregulatory function of the hindgut inLocusta migratoria
Source: Oxford University Press journal article supplement (doi:10.1242/jeb.173930), 2018-01-01
Supplement: jeb173930supp.pdf [file jeb173930supp.pdf]

**Table S1.** Net water and ion flux measured across the rectal wall of cold-acclimated *Locusta migratoria* after acute exposure to high temperature (i.e. 2 h at 30 °C) prior to incubation at 10 °C.

| Acclimation group | $J_v$                                                                             |                      | $J_{Na}$                                                                       |                      | $J_K$                                                                             |                      | $J_{Cl}$                                                                       |                      |
|-------------------|-----------------------------------------------------------------------------------|----------------------|--------------------------------------------------------------------------------|----------------------|-----------------------------------------------------------------------------------|----------------------|--------------------------------------------------------------------------------|----------------------|
|                   | 30 °C                                                                             | 10 °C                | 30 °C                                                                          | 10 °C                | 30 °C                                                                             | 10 °C                | 30 °C                                                                          | 10 °C                |
| Warm acclimated   | 14,68 ± 0,66 <b>a</b>                                                             | 4,73 ± 0,44 <b>b</b> | 0,49 ± 0,03 <b>a</b>                                                           | 0,16 ± 0,01 <b>b</b> | 0,83 ± 0,03 <b>a</b>                                                              | 0,24 ± 0,02 <b>b</b> | 0,65 ± 0,04 <b>a</b>                                                           | 0,31 ± 0,02 <b>b</b> |
| Cold acclimated   | 14,64 ± 0,65 <b>a</b>                                                             | 4,36 ± 0,22 <b>b</b> | 0,49 ± 0,04 <b>a</b>                                                           | 0,16 ± 0,01 <b>b</b> | 0,70 ± 0,04 <b>a</b>                                                              | 0,21 ± 0,01 <b>b</b> | 0,68 ± 0,12 <b>a</b>                                                           | 0,32 ± 0,08 <b>b</b> |
| RM-2-way ANOVA    | Acclimation: P=0.5244<br>Temperature: <b>P&lt;0.0001</b><br>Interaction: P=0.8949 |                      | Acclimation: P=0.8101<br>Temperature: <b>P=0.0001</b><br>Interaction: P=0.9119 |                      | Acclimation: P=0.1271<br>Temperature: <b>P&lt;0.0001</b><br>Interaction: P=0.7296 |                      | Acclimation: P=0.8548<br>Temperature: <b>P=0.0231</b><br>Interaction: P=0.9100 |                      |

In this set of acclimated-locusts, the order of the incubation periods was reversed to test the plasticity and reversibility of the acclimation response. Hence, everted sacs from cold-acclimated locusts were first incubated at 30 °C prior to incubation at 10 °C (the temperature at which cold-acclimation enhanced  $J_v$  and  $J_{ion}$ ; cf. Fig.2). Net water flux ( $J_v$ ) is expressed as  $\mu\text{l rectum}^{-1} \text{h}^{-1}$  and net ion flux ( $J_{ion}$ ) as  $\mu\text{mol h}^{-1}$  per rectum, where rectum size was standardized to 0.631  $\text{cm}^2$ . Positive values for  $J_v$  and  $J_{ion}$  indicate net reabsorption from the rectal lumen towards the haemolymph.  $N=5$  per group and the statistical significance of each factors are presented in the table following repeated-measures two-way ANOVA.
